# Supplementary material
Source: PubMed Central journal article supplement (PMC3272978)
Supplement: supp_32.4.774_MCB6195-11_ST1.pdf [file supp_32.4.774_MCB6195-11_ST1.pdf]

## Appendix

**Table A1: MALDI-TOF MS and LC-MS/MS analyses of lysosome-enriched fraction**

| Coomassie Blue-stained Spots (#) <sup>a</sup> |          | Man6P eluate <sup>b</sup>                         | Non bound <sup>c</sup>                   |
|-----------------------------------------------|----------|---------------------------------------------------|------------------------------------------|
| <b>Known lysosomal proteins</b>               |          |                                                   |                                          |
| Legumain                                      | (#59→68) | Legumain                                          | Legumain                                 |
| Dipeptidyl peptidase 1                        | (#56→58) | Dipeptidyl peptidase 1                            | Dipeptidyl peptidase 1                   |
| Protein CREG1                                 | (#46→51) | Protein CREG1                                     | Protein CREG1                            |
| Cathepsin D                                   | (#26→38) | Cathepsin D                                       | Cathepsin D                              |
| Cathepsin Z                                   | (#38→44) | Cathepsin Z                                       |                                          |
| $\alpha$ -N-acetylgalactosaminidase           | (#16→25) | $\alpha$ -N-acetylgalactosaminidase               | $\alpha$ -N-acetylgalactosaminidase      |
| Cathepsin A                                   | (#45)    | $\beta$ -hexosaminidase subunit $\alpha$          | $\beta$ -hexosaminidase subunit $\alpha$ |
| Dipeptidyl peptidase 2                        | (#9→15)  | Dipeptidyl peptidase 2                            | Dipeptidyl peptidase 2                   |
| Epididymal secretory protein E1 (Npc2)        | (#51→54) | Lysosomal $\alpha$ -glucosidase                   | Lysosomal $\alpha$ -glucosidase          |
| Sphingomyelin phosphodiesterase, acid like 3a | (#1→3)   | Lysosomal $\alpha$ -mannosidase                   | Lysosomal $\alpha$ -mannosidase          |
| Palmitoyl-protein Thioesterase 1              | (#69→71) | Palmitoyl-protein Thioesterase 1                  | Palmitoyl-protein Thioesterase 1         |
|                                               |          | Group XV phospholipase A <sub>2</sub>             | Group XV phospholipase A <sub>2</sub>    |
|                                               |          | Epididymis-specific $\alpha$ -mannosidase         |                                          |
|                                               |          | Phospholipase D4                                  | Phospholipase D4                         |
| <b>Non known lysosomal proteins</b>           |          | $\beta$ -glucuronidase                            |                                          |
| Serpin1AC                                     | (#72)    | Retinoid-inducible carboxypeptidase               | serine                                   |
| Fibrinogen $\gamma$                           | (#4→8)   | Putative phospholipase B-like 2                   |                                          |
|                                               |          | $\beta$ -galactosidase                            |                                          |
|                                               |          | Pro-cathepsin H                                   |                                          |
|                                               |          | Sphingomyelin phosphodiesterase                   |                                          |
|                                               |          | Plasma glutamate carboxypeptidase                 |                                          |
|                                               |          | $\beta$ -hexosaminidase subunit $\beta$           |                                          |
|                                               |          | Lysosomal acid lipase/cholesteryl ester hydrolase |                                          |

|                                              |                   |                                                     |
|----------------------------------------------|-------------------|-----------------------------------------------------|
|                                              |                   | Cathepsin B                                         |
| Mammalian                                    | ependymin-related |                                                     |
| protein 1                                    |                   |                                                     |
| N(4)-(β-N-acetylglucosaminy1)-L-asparaginase |                   | N(4)-(β-N-acetylglucosaminy1)-L-asparaginase        |
| Phospholipase B-like 1                       |                   |                                                     |
| Serine protease inhibitor A3C                |                   |                                                     |
| Ferritin light chain 1                       |                   |                                                     |
|                                              |                   | Apolipoprotein E                                    |
| Hemoglobin subunit epsilon-Y2                |                   | Hemoglobin subunit epsilon-Y2                       |
| Ribonuclease UK114                           |                   |                                                     |
| Ribonuclease T2                              |                   |                                                     |
| Prefoldin subunit 1                          |                   |                                                     |
| Elongation factor 2                          |                   |                                                     |
| AT-rich                                      | interactive       | domain-                                             |
| containing protein 1A                        |                   |                                                     |
|                                              |                   | ATP synthase subunit □, mitochondrial               |
|                                              |                   | ATP synthase subunit □, mitochondrial               |
|                                              |                   | Copine-3                                            |
|                                              |                   | Peroxisomal bifunctional enzyme                     |
|                                              |                   | Lysosomal protein NCU-G1                            |
|                                              |                   | Lysosome-associated membrane glycoprotein 2         |
|                                              |                   | Probable lysosomal cobalamin transporter            |
|                                              |                   | Prolow-density lipoprotein receptor-related protein |
|                                              |                   | Long-chain-fatty-acid-CoA ligase 1                  |
|                                              |                   | Ig γ-2B chain C r                                   |
|                                              |                   | V-type proton ATPase subunit E                      |

Transmembrane protein 106

$\alpha$ -soluble NSF attachment protein

Hydroxyacyl-coenzyme A dehydrogenase, mitochondrial

V-type proton ATPase subunit  $\beta$ , brain isoform

$\beta$ -actin-like protein 2

Succinate dehydrogenase [ubiquinone] flavoprotein subunit, mitochondrial

Receptor-type tyrosine-protein phosphatase C

Protein disulfide-isomerase A3

ATP-binding cassette sub-family B member 6, mitochondrial

Phospholipid transfer protein

Amine oxidase [flavin-containing] B

Serum albumin

Fibronectin

Serotransferrin

<sup>a</sup>2D separation of 200 $\mu$ g of lysosome-enriched fraction prepared from *Acp2/Acp5* <sup>-/-</sup> mice and stained by Coomassie Blue (n=3). The numbering (#) corresponds to identified spots encircled in Supplementary Figure 2

<sup>b</sup>Man6P eluate fraction after Man6P-affinity chromatography of lysosome-enriched fraction (150 $\mu$ g) prepared from *Acp2/Acp5* <sup>-/-</sup> mice

<sup>c</sup>Non bound fraction after Man6P-affinity chromatography of lysosome-enriched fraction prepared from *Acp2/Acp5* <sup>-/-</sup> mice
